# Supplementary material
Source: MDPI journal article supplement (https://www.mdpi.com/1999-4907/11/11/1223)
Supplement: s1 [file s1]

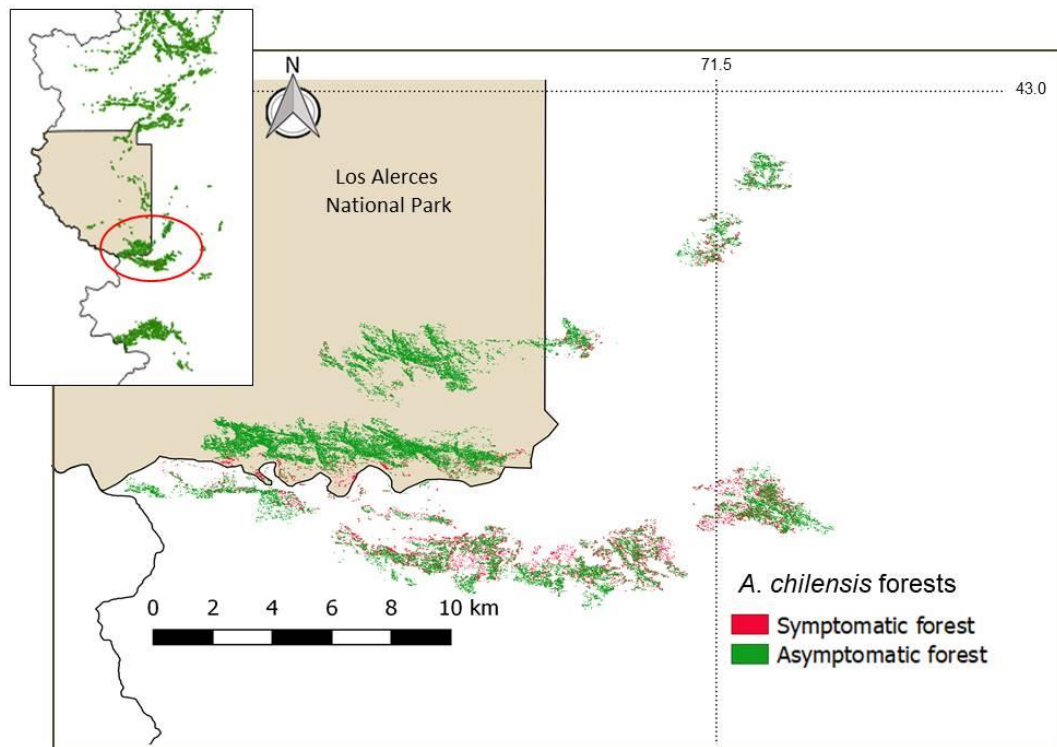

**Figure S2.** Distribution of *Austrocedrus chilensis* forests in Chubut province, Argentina (Source: Forest Inventory, Report by CIEFAP, 2016) and the detail of the distribution of diseased and asymptomatic forests in Río Grande valley (Source: La Manna et al. 2008 [2]).

[2] La Manna, L.; Carabelli, F.; Gómez, M.; Matteucci, S.D. Disposición espacial de parches de *Austrocedrus chilensis* con síntomas de defoliación y mortalidad en el Valle 16 de Octubre (Chubut, Argentina). *Bosque* **2008**, *29*, 23–32, doi:10.4067/S0717-92002008000100003
