# Supplementary material
Source: MDPI journal article supplement (https://www.mdpi.com/1999-4907/11/11/1223)
Supplement: s1 [file s1]

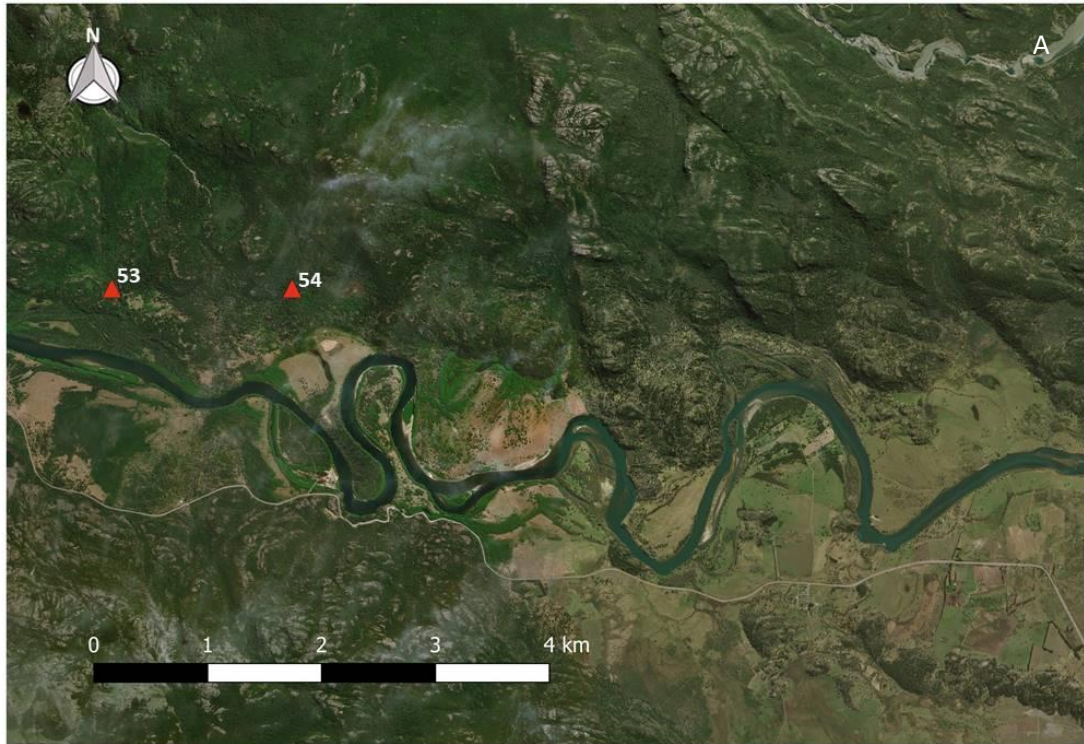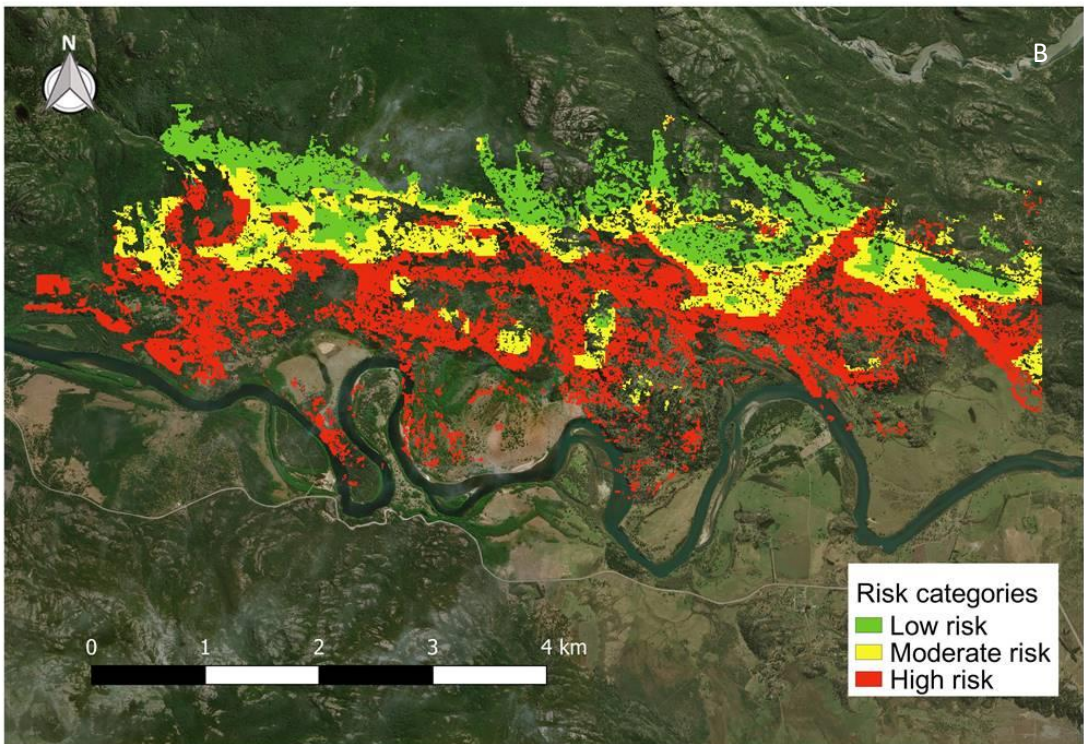

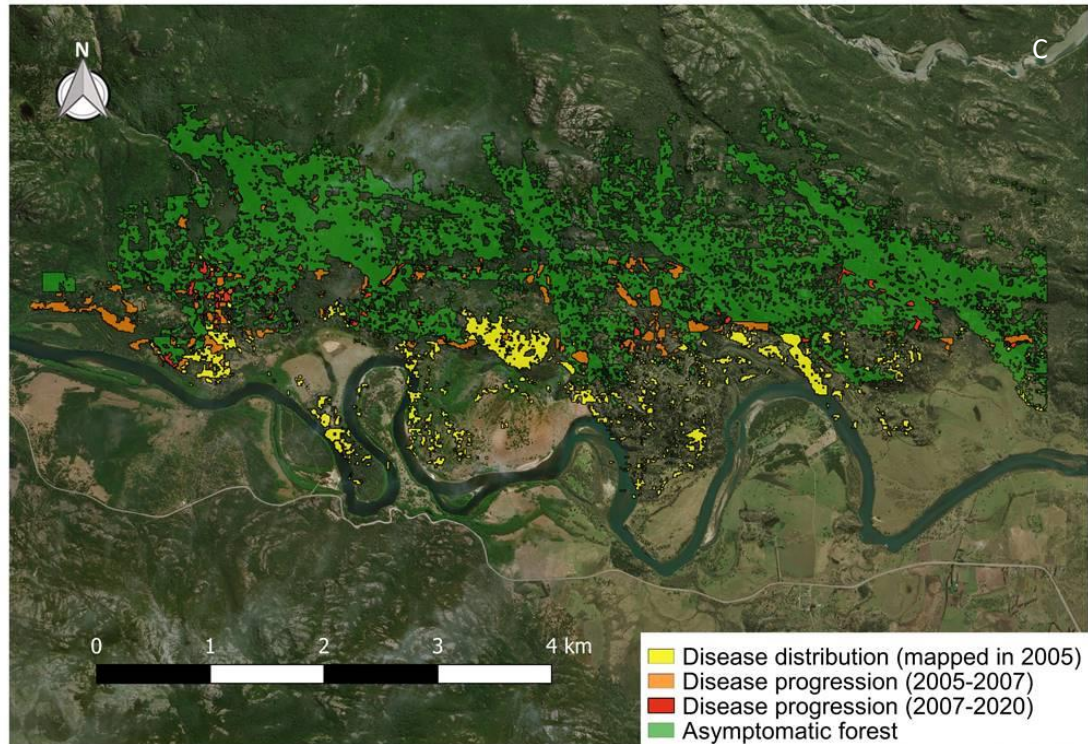

**Figure S1.** A) Study area of *Austrocedrus* disease distribution over time. Location of samples 53 and 54 from sampling site 11 of the *Phytophthora* diversity study are also shown. B) *Austrocedrus* disease risk according to abiotic factors (Risk model based on La Manna et al. 2012 [1]). C) *Austrocedrus* disease distribution over time.

[1] La Manna, L.; Matteucci, S.D.; Kitzberger, T. Modelling potential *Phytophthora* disease risk in *Austrocedrus chilensis* forests of Patagonia. *Eur. J. For. Res.* **2012**, *131*, 323–337, doi:10.1007/s10342-011-0503-7
